# Supplementary material for: A Clinical Study of Urine Amino Acids in Children with Autism Spectrum Disorder
Source: MDPI journal article supplement (doi:10.3390/life14050629), 2024-05-15
Supplement: s1 [file s1]

Table S1. Comparison of urinary amino acid means using nonparametric tests (Mann-Whitney test and Wilcoxon test).

| <b>Urine amino acids</b> | <b>U (Mann-Whitney)</b> | <b>W (Wilcoxon)</b> | <b>P</b> | <b>Z</b> |
|--------------------------|-------------------------|---------------------|----------|----------|
| taurine                  | 590.500                 | 1055.500            | 0.361    | -0.914   |
| ornithine                | 613.000                 | 1648.000            | 0.502    | -0.672   |
| asparagine               | 552.500                 | 1017.500            | 0.185    | -1.325   |
| glicine                  | 529.000                 | 994.000             | 0.114    | -1.579   |
| citrulline               | 528.500                 | 993.500             | 0.104    | -1.627   |
| hydroxyproline           | 493.500                 | 958.500             | 0.048    | -1.974   |
| threonine                | 539.500                 | 1004.500            | 0.143    | -1.466   |
| proline                  | 576.000                 | 1041.000            | 0.283    | -1.073   |
| alpha amino butiric acid | 650.000                 | 1115.000            | 0.787    | -0.271   |
| valine                   | 531.000                 | 996.000             | 0.119    | -1.558   |
| methionine               | 546.000                 | 1011.000            | 0.162    | -1.398   |
| isoleucine               | 566.000                 | 1031.000            | 0.238    | -1.179   |
| phenylalanylsne          | 560.500                 | 1025.500            | 0.216    | -1.239   |
| aspartic acid            | 473.000                 | 938.000             | 0.029    | -2.189   |
| sarcosine                | 554.500                 | 1019.500            | 0.069    | -1.820   |
| alanylsne                | 535.500                 | 1000.500            | 0.131    | -0.131   |
| Alpha amino-adipic acid  | 574.000                 | 1039.000            | 0.275    | -1.093   |
| beta alanylsne           | 618.500                 | 1083.500            | 0.541    | -0.611   |

Table S2. Urinary aminoacids. ANOVA test

| Urine amino acids        | df | F                   | P     |
|--------------------------|----|---------------------|-------|
| histidine                | 3  | 0.490               | 0.690 |
| lisine                   | 3  | 0.070               | 0.976 |
| arginine                 | 3  | 0.426               | 0.735 |
| cystine                  | 3  | 0.597               | 0.619 |
| asparagine               | 3  | $\chi^2(3) = 4.239$ | 0.237 |
| glutamine                | 3  | 2.355               | 0.079 |
| serine                   | 3  | 1.715               | 0.172 |
| glycine                  | 3  | 0.805               | 0.495 |
| citrulline               | 3  | 1.130               | 0.343 |
| hydroxyproline           | 3  | 2.820               | 0.045 |
| proline                  | 3  | 0.515               | 0.673 |
| Alpha amino butyric acid | 3  | $\chi^2(3)=8.720$   | 0.033 |
| valine                   | 3  | 1.213               | 0.311 |
| methionine               | 3  | 1.385               | 0.254 |
| tyrosine                 | 3  | 1.309               | 0.278 |
| isoleucine               | 3  | 0.577               | 0.632 |
| leucine                  | 3  | 0.702               | 0.554 |
| phenylalanyne            | 3  | 0.476               | 0.700 |
| alpha amino adipic acid  | 3  | 0.958               | 0.417 |
| beta alanyne             | 3  | 0.327               | 0.806 |

F means Fisher's ratio = intergroup dispersion/intragroup dispersion (the higher the value of the ratio, the greater the dispersion of the sample means than the dispersion of the values of the null population) according to the DF (degree of freedom). ex :  $F(3)=0.89$ .

Table S3. Comparative analysis of urinary serine, threonine and aspartic acid values for the study group (autism) and the control group according to male (m) and female (f) gender using the Tamhane Test and the Dunnett Test

| (I) Female (F) | (J) Male (M) | Mean difference (I-J) | Standard error | Sig. | 95% Confidence |                |
|----------------|--------------|-----------------------|----------------|------|----------------|----------------|
|                |              |                       |                |      | Inferior limit | Superior limit |

| Serine        |           |           |        |       |          |         |
|---------------|-----------|-----------|--------|-------|----------|---------|
| Tamhane Test  |           |           |        |       |          |         |
| Control F     | Control M | 76.561    | 35.133 | 0.207 | -22.950  | 176.073 |
|               | Autism F  | -53.623   | 83.630 | 0.990 | -319.631 | 212.384 |
|               | Autism M  | -30.652   | 40.013 | 0.972 | -140.788 | 79.484  |
| Control M     | Control F | -76.561   | 35.133 | 0.207 | -176.073 | 22.950  |
|               | Autism F  | -130.184  | 81.807 | 0.600 | -395.101 | 134.732 |
|               | Autism M  | -107.213* | 36.047 | 0.028 | -206.531 | -7.896  |
| Autism F      | Control F | 53.623    | 83.630 | 0.990 | -212.384 | 319.631 |
|               | Control M | 130.184   | 81.807 | 0.600 | -134.732 | 395.101 |
|               | Autism M  | 22.971    | 84.018 | 1.000 | -243.073 | 289.016 |
| Autism M      | Control F | 30.652    | 40.013 | 0.972 | -79.484  | 140.788 |
|               | Control M | 107.213*  | 36.047 | 0.028 | 7.896    | 206.531 |
|               | Autism F  | -22.971   | 84.018 | 1.000 | -289.016 | 243.073 |
| Dunnet Test   |           |           |        |       |          |         |
| Control F     | Control M | 76.561    | 35.133 | 0.198 | -22.512  | 175.634 |
|               | Autism F  | -53.623   | 83.630 | 0.984 | -315.255 | 208.008 |
|               | Autism M  | -30.652   | 40.013 | 0.968 | -140.526 | 79.222  |
| Control M     | Control F | -76.561   | 35.133 | 0.198 | -175.634 | 22.512  |
|               | Autism F  | -130.184  | 81.807 | 0.543 | -390.116 | 129.747 |
|               | Autism M  | -107.213* | 36.047 | 0.028 | -206.288 | -8.139  |
| Autism F      | Control F | 53.623    | 83.630 | 0.984 | -208.008 | 315.255 |
|               | Control M | 130.184   | 81.807 | 0.543 | -129.747 | 390.116 |
|               | Autism M  | 22.971    | 84.018 | 1.000 | -238.849 | 284.792 |
| Autism M      | Control F | 30.652    | 40.013 | 0.968 | -79.222  | 140.526 |
|               | Control M | 107.213*  | 36.047 | 0.028 | 8.139    | 206.288 |
|               | Autism F  | -22.971   | 84.018 | 1.000 | -284.792 | 238.849 |
| Threonine     |           |           |        |       |          |         |
| Tamhane Test  |           |           |        |       |          |         |
| Control sex f | Control M | 45.13     | 19.31  | 0.154 | -9.832   | 100.094 |
|               | Autism F  | -26.57    | 41.75  | 0.990 | -157.239 | 104.086 |
|               | Autism M  | -24.57    | 24.57  | 0.903 | -92.068  | 42.915  |
| Control M     | Control F | -45.13    | 19.31  | 0.154 | -100.094 | 9.832   |
|               | Autism F  | -71.70    | 39.91  | 0.474 | -200.940 | 57.525  |
|               | Autism M  | -69.70*   | 21.29  | 0.012 | -128.244 | -11.171 |
| Autism sex f  | Control F | 26.57     | 41.75  | 0.990 | -104.086 | 157.239 |
|               | Control M | 71.70     | 39.91  | 0.474 | -57.525  | 200.940 |

|                 |           |        |       |       |          |         |
|-----------------|-----------|--------|-------|-------|----------|---------|
| Autism<br>sex m | Autism M  | 2.00   | 42.70 | 1.000 | -129.457 | 133.457 |
|                 | Control F | 24.57  | 24.57 | 0.903 | -42.915  | 92.068  |
|                 | Control M | 69.70* | 21.29 | 0.012 | 11.171   | 128.244 |
|                 | Autism F  | -2.00  | 42.70 | 1.000 | -133.457 | 129.457 |

### Acid aspartic în urină

| Tamhane Test |           |         |       |       |         |        |
|--------------|-----------|---------|-------|-------|---------|--------|
| Control F    | Control M | 4.054   | 2.797 | 0.645 | -3.879  | 11.987 |
|              | Autism F  | -5.076  | 5.051 | 0.912 | -20.603 | 10.450 |
|              | Autism M  | -4.233  | 3.174 | 0.716 | -12.985 | 4.517  |
| Control M    | Control F | -4.054  | 2.797 | 0.645 | -11.987 | 3.879  |
|              | Autism F  | -9.130  | 4.814 | 0.407 | -24.399 | 6.137  |
|              | Autism M  | -8.287  | 2.781 | 0.028 | -15.951 | -0.625 |
| Autism F     | Control F | 5.076   | 5.051 | 0.912 | -10.450 | 20.603 |
|              | Control M | 9.130   | 4.814 | 0.407 | -6.137  | 24.399 |
|              | Autism M  | 0.842   | 5.042 | 1.000 | -14.627 | 16.313 |
| Autism M     | Control F | 4.233   | 3.174 | 0.716 | -4.517  | 12.985 |
|              | Control M | 8.287   | 2.781 | 0.028 | 0.625   | 15.951 |
|              | Autism F  | -0.842  | 5.042 | 1.000 | -16.313 | 14.627 |
| Control F    | Control M | 4.054   | 2.797 | 0.622 | -3.843  | 11.952 |
|              | Autism F  | -5.076  | 5.051 | 0.886 | -20.412 | 10.259 |
|              | Autism M  | -4.233  | 3.174 | 0.702 | -12.963 | 4.496  |
| Control M    | Control F | -4.054  | 2.797 | 0.622 | -11.952 | 3.843  |
|              | Autism F  | -9.130  | 4.814 | 0.366 | -24.153 | 5.892  |
|              | Autism M  | -8.287* | 2.781 | 0.027 | -15.932 | -0.643 |
| Autism F     | Control F | 5.076   | 5.051 | 0.886 | -10.259 | 20.412 |
|              | Control M | 9.130   | 4.814 | 0.366 | -5.892  | 24.153 |
|              | Autism M  | .842    | 5.042 | 1.000 | -14.441 | 16.126 |
| Autism M     | Control F | 4.233   | 3.174 | 0.702 | -4.496  | 12.963 |
|              | Control M | 8.287*  | 2.781 | 0.027 | 0.643   | 15.932 |
|              | Autism F  | -0.842  | 5.042 | 1.000 | -16.126 | 14.441 |

\*. Mean difference is significant at  $p < 0.05$

Table S4. ANOVA analysis across groups and within groups (autism and control) for urinary histidine values.

|                | Sum of squares | df | Mean of squares | F     | Sig.  |
|----------------|----------------|----|-----------------|-------|-------|
| Between groups | 1945582.054    | 3  | 648527.351      | 2.749 | 0.049 |
| Within groups  | 16749484.613   | 71 | 235908.234      |       |       |

Table S5. Tukey and Bonferroni analysis for multiple comparisons by age group for urinary histidine.

| (I) age groups    | (J) age groups    | Mean difference (I-J) | Standard error | Sig.  | 95% Confidence |                |
|-------------------|-------------------|-----------------------|----------------|-------|----------------|----------------|
|                   |                   |                       |                |       | Inferior limit | Superior limit |
| Tukey             |                   |                       |                |       |                |                |
| Control < 5 years | Control > 5 years | 145.568               | 200.528        | 0.886 | -382.009       | 673.146        |
|                   | Autism < 5 years  | -210.650              | 203.184        | 0.729 | -745.215       | 323.915        |
|                   | Autism > 5 years  | 171.470               | 197.293        | 0.821 | -347.597       | 690.537        |
| Control > 5 years | Control < 5 years | -145.568              | 200.528        | 0.886 | -673.146       | 382.009        |
|                   | Autism < 5 years  | -356.218              | 150.061        | 0.092 | -751.021       | 38.585         |
|                   | Autism > 5 years  | 25.901                | 141.983        | 0.998 | -347.649       | 399.452        |
| Autism < 5 years  | Control < 5 years | 210.650               | 203.184        | 0.729 | -323.915       | 745.215        |
|                   | Control > 5 years | 356.218               | 150.061        | 0.092 | -38.585        | 751.021        |
|                   | Autism > 5 years  | 382.120               | 145.711        | 0.051 | -1.237         | 765.477        |
| Autism > 5 years  | Control < 5 years | -171.470              | 197.293        | 0.821 | -690.537       | 347.597        |
|                   | Control > 5 years | -25.901               | 141.983        | 0.998 | -399.452       | 347.649        |
|                   | Autism < 5 years  | -382.120              | 145.711        | 0.051 | -765.477       | 1.237          |
| Bonferroni        |                   |                       |                |       |                |                |
| Control < 5 years | Control > 5 years | 145.568               | 200.528        | 1.000 | -398.704       | 689.840        |
|                   | Autism < 5 years  | -210.650              | 203.184        | 1.000 | -762.131       | 340.831        |
|                   | Autism > 5 years  | 171.470               | 197.293        | 1.000 | -364.023       | 706.963        |
| Control > 5 years | Control < 5 years | -145.568              | 200.528        | 1.000 | -689.840       | 398.704        |
|                   | Autism < 5 years  | -356.218              | 150.061        | 0.122 | -763.514       | 51.078         |
|                   | Autism > 5 years  | 25.901                | 141.983        | 1.000 | -359.470       | 411.273        |
| Autism < 5 years  | Control < 5 years | 210.650               | 203.184        | 1.000 | -340.831       | 762.131        |
|                   | Control > 5 years | 356.218               | 150.061        | 0.122 | -51.078        | 763.514        |
|                   | Autism > 5 years  | 382.120               | 145.711        | 0.064 | -13.368        | 777.608        |
| Autism > 5 years  | Control < 5 years | -171.470              | 197.293        | 1.000 | -706.963       | 364.023        |
|                   | Control > 5 years | -25.901               | 141.983        | 1.000 | -411.273       | 359.470        |

|                  |          |         |      |          |        |
|------------------|----------|---------|------|----------|--------|
| Autism < 5 years | -382.120 | 145.711 | .064 | -777.608 | 13.368 |
|------------------|----------|---------|------|----------|--------|

Table S6. Bonferroni analysis for multiple comparisons by age group for urinary threonine.

| (I) age groups    | (j) age groups    | Mean difference (I-J) | Standard error | Sig.  | 95% Confidence Interval | Superior limit |
|-------------------|-------------------|-----------------------|----------------|-------|-------------------------|----------------|
| Control < 5 years | Control > 5 years | -0.875                | 37.236         | 1.000 | -101.941                | 100.191        |
|                   | Autism < 5 years  | -88.225               | 37.729         | 0.133 | -190.630                | 14.180         |
|                   | Autism > 5 years  | -10.815               | 36.635         | 1.000 | -110.251                | 88.621         |
| Control > 5 years | Control < 5 years | 0.875                 | 37.236         | 1.000 | -100.191                | 101.941        |
|                   | Autism < 5 years  | -87.350*              | 27.865         | 0.015 | -162.981                | -11.719        |
|                   | Autism > 5 years  | -9.940                | 26.365         | 1.000 | -81.500                 | 61.620         |
| Autism < 5 years  | Control < 5 years | 88.225                | 37.729         | 0.133 | -14.180                 | 190.630        |
|                   | Control > 5 years | 87.350*               | 27.865         | 0.015 | 11.719                  | 162.981        |
|                   | Autism > 5 years  | 77.410*               | 27.057         | 0.033 | 3.972                   | 150.848        |
| Autism > 5 years  | Control < 5 years | 10.815                | 36.635         | 1.000 | -88.621                 | 110.251        |
|                   | Control > 5 years | 9.940                 | 26.365         | 1.000 | -61.620                 | 81.500         |
|                   | Autism < 5 years  | -77.410*              | 27.057         | 0.033 | -150.848                | -3.972         |

\*. Mean difference is significant at  $p < 0.05$

Table S7. ANOVA across groups for between-group comparisons for urinary aspartic acid

|                | Sum of squares | df | Mean of squares | F     | Sig.  |
|----------------|----------------|----|-----------------|-------|-------|
| Between groups | 1659.116       | 3  | 553.039         | 4.490 | 0.006 |
| Within groups  | 8746.031       | 71 | 123.184         |       |       |

Table S8. Bonferroni analysis for multiple comparisons by age for urinary aspartic acid

| (I) age groups    | (j) age groups    | Mean difference (I-J) | Standard error | Sig.  | 95% Confidence Interval | Superior limit |
|-------------------|-------------------|-----------------------|----------------|-------|-------------------------|----------------|
| Control < 5 years | Control > 5 years | 1.613                 | 4.582          | 1.000 | -10.824                 | 14.051         |
|                   | Autism < 5 years  | -10.150               | 4.643          | 0.193 | -22.752                 | 2.452          |
|                   | Autism > 5 years  | -0.870                | 4.508          | 1.000 | -13.107                 | 11.367         |
|                   | Control < 5 years | -1.613                | 4.582          | 1.000 | -14.051                 | 10.824         |

|                      |                   |          |       |       |         |        |
|----------------------|-------------------|----------|-------|-------|---------|--------|
| Control > 5<br>years | Autism < 5years   | -11.763* | 3.429 | 0.006 | -21.071 | -2.457 |
|                      | Autism > 5 years  | -2.483   | 3.244 | 1.000 | -11.290 | 6.322  |
| Autism < 5<br>years  | Control < 5years  | 10.150   | 4.643 | 0.193 | -2.452  | 22.752 |
|                      | Control > 5 years | 11.763*  | 3.429 | 0.006 | 2.457   | 21.071 |
| Autism > 5<br>years  | Autism > 5 years  | 9.280*   | 3.329 | 0.041 | 0.243   | 18.317 |
|                      | Control < 5years  | 0.870    | 4.508 | 1.000 | -11.367 | 13.107 |
|                      | Control > 5 years | 2.483    | 3.244 | 1.000 | -6.322  | 11.290 |
|                      | Autism < 5years   | -9.280*  | 3.329 | 0.041 | -18.317 | -0.243 |

\*. Mean difference is significant at  $p < 0.05$

Table S9. Between-group ANOVA analysis for urinary glutamic acid values

|                | Sum of<br>squares | df | Mean of<br>squares | F     | Sig.  |
|----------------|-------------------|----|--------------------|-------|-------|
| Between groups | 2284.947          | 3  | 761.649            | 2.917 | 0.040 |
| Within groups  | 18538.333         | 71 | 261.103            |       |       |

Table S10. Bonferroni correction for multiple comparisons by age between groups for urinary glutamic acid

| (I)age<br>groups     | (j) age groups    | Mean<br>differenc<br>e (I-J) | Stand<br>ard<br>error | Sig.  | 95% Confidence<br>Inferior<br>limit | Superior<br>limit |
|----------------------|-------------------|------------------------------|-----------------------|-------|-------------------------------------|-------------------|
| Control<br>< 5 years | Control > 5years  | 4.715                        | 6.671                 | 1.000 | -13.391                             | 22.823            |
|                      | Autism < 5 years  | -3.375                       | 6.759                 | 1.000 | -21.722                             | 14.972            |
|                      | Autism > 5years   | 10.505                       | 6.563                 | 0.684 | -7.310                              | 28.320            |
| Control<br>> 5 years | Control < 5 years | -4.715                       | 6.671                 | 1.000 | -22.823                             | 13.391            |
|                      | Autism < 5 years  | -8.090                       | 4.992                 | 0.657 | -21.641                             | 5.459             |
|                      | Autism > 5years   | 5.789                        | 4.723                 | 1.000 | -7.032                              | 18.610            |
| Autism<br>< 5 years  | Control < 5 years | 3.375                        | 6.759                 | 1.000 | -14.972                             | 21.722            |
|                      | Control > 5years  | 8.090                        | 4.992                 | 0.657 | -5.459                              | 21.641            |
|                      | Autism > 5years   | 13.880*                      | 4.847                 | 0.033 | 0.723                               | 27.037            |
| Autism<br>> 5years   | Control < 5 years | -10.505                      | 6.563                 | 0.684 | -28.320                             | 7.310             |
|                      | Control > 5years  | -5.789                       | 4.723                 | 1.000 | -18.610                             | 7.032             |
|                      | Autism < 5 years  | -13.880*                     | 4.847                 | 0.033 | -27.037                             | -0.723            |

\*. Mean difference is significant at  $p < 0.05$

Table S11. ANOVA test for the comparative analysis of urinary beta-alanine by age between the control group and the control group

|                | Sum of squares | df | Mean of squares | F     | Sig.  |
|----------------|----------------|----|-----------------|-------|-------|
| Between groups | 11847.906      | 3  | 3949.302        | 6.066 | 0.001 |
| Within groups  | 46221.481      | 71 | 651.007         |       |       |

Table S12. Tamhane test for multiple comparisons between urinary beta-alanine values according to age groups for the studied groups (autism and control)

| (I)age groups     | (j) age groups    | Mean difference (I-J) | Standard error | Sig.  | 95% Confidence Interval limit | Superior limit |
|-------------------|-------------------|-----------------------|----------------|-------|-------------------------------|----------------|
| Control < 5 years | Control > 5 years | 12.636                | 11.821         | 0.893 | -26.120                       | 51.392         |
|                   | Autism < 5 years  | -12.950               | 13.518         | 0.927 | -53.758                       | 27.858         |
|                   | Autism > 5 years  | 17.680                | 11.163         | 0.629 | -21.152                       | 56.512         |
| Control > 5 years | Control < 5 years | -12.636               | 11.821         | 0.893 | -51.392                       | 26.120         |
|                   | Autism < 5 years  | -25.586               | 9.376          | 0.061 | -51.933                       | 0.760          |
|                   | Autism > 5 years  | 5.043                 | 5.458          | 0.933 | -10.206                       | 20.294         |
| Autism < 5 years  | Control < 5 years | 12.950                | 13.518         | 0.927 | -27.858                       | 53.758         |
|                   | Control > 5 years | 25.586                | 9.376          | 0.061 | -0.760                        | 51.933         |
|                   | Autism > 5 years  | 30.630*               | 8.532          | 0.009 | 6.107                         | 55.153         |
| Autism > 5 years  | Control < 5 years | -17.680               | 11.163         | 0.629 | -56.512                       | 21.152         |
|                   | Control > 5 years | -5.043                | 5.458          | 0.933 | -20.294                       | 10.206         |
|                   | Autism < 5 years  | -30.630*              | 8.532          | 0.009 | -55.153                       | -6.107         |

\*. Mean difference is significant at  $p < 0.05$

Table S13. ANOVA test for comparison of urinary alpha-amino-adipic acid by age between controls and controls

|                | Sum of squares | df | Mean of squares | F     | Sig.  |
|----------------|----------------|----|-----------------|-------|-------|
| Between groups | 45577.639      | 3  | 15192.546       | 6.582 | 0.001 |
| Within groups  | 163881.348     | 71 | 2308.188        |       |       |



Table S14. Tamhane test for multiple comparisons by age group for urinary alpha aminoadipic acid.

| (I)age groups     | (j) age groups    | Mean difference (I-J) | Standard error | Sig.  | 95% Confidence<br>Inferior limit | Superior limit |
|-------------------|-------------------|-----------------------|----------------|-------|----------------------------------|----------------|
| Control < 5 years | Control > 5 years | 39.693                | 24.365         | 0.603 | -45.156                          | 124.543        |
|                   | Autism < 5years   | -16.925               | 28.466         | 0.993 | -104.320                         | 70.470         |
|                   | Autism > 5 years  | 36.275                | 24.406         | 0.687 | -48.540                          | 121.090        |
| Control > 5 years | Control < 5years  | -39.693               | 24.365         | 0.603 | -124.543                         | 45.156         |
|                   | Autism < 5years   | -56.618*              | 16.870         | 0.016 | -104.953                         | -8.284         |
|                   | Autism > 5 years  | -3.418                | 8.364          | 0.999 | -26.436                          | 19.600         |
| Autism < 5 years  | Control < 5years  | 16.925                | 28.466         | 0.993 | -70.470                          | 104.320        |
|                   | Control > 5 years | 56.618*               | 16.870         | 0.016 | 8.284                            | 104.953        |
|                   | Autism > 5 years  | 53.200*               | 16.930         | 0.026 | 4.755                            | 101.645        |
| Autism > 5 years  | Control < 5years  | -36.275               | 24.406         | 0.687 | -121.090                         | 48.540         |
|                   | Control > 5 years | 3.418                 | 8.364          | 0.999 | -19.600                          | 26.436         |
|                   | Autism < 5years   | -53.200*              | 16.930         | 0.026 | -101.645                         | -4.755         |

\*. Mean difference is significant at  $p < 0.05$ 

Table S15. Tamhane multiple comparisons test by age for urinary valine.

| (I)age groups     | (j) age groups    | Mean difference (I-J) | Standard error | Sig.  | 95% Confidence<br>Inferior limit | Superior confidence |
|-------------------|-------------------|-----------------------|----------------|-------|----------------------------------|---------------------|
| Control < 5years  | Control > 5 years | 13.670                | 11.040         | 0.821 | -24.148                          | 51.489              |
|                   | Autism < 5years   | -13.125               | 13.115         | 0.912 | -52.816                          | 26.566              |
|                   | Autism > 5 years  | 10.705                | 11.007         | 0.930 | -27.125                          | 48.535              |
| Control > 5 years | Control < 5years  | -13.670               | 11.040         | 0.821 | -51.489                          | 24.148              |
|                   | Autism < 5years   | -26.795*              | 8.395          | 0.022 | -50.749                          | -2.842              |
|                   | Autism > 5 years  | -2.965                | 4.429          | 0.986 | -15.161                          | 9.230               |

|                     |                   |         |        |       |         |        |
|---------------------|-------------------|---------|--------|-------|---------|--------|
| Autism<br>< 5years  | Control < 5years  | 13.125  | 13.115 | 0.912 | -26.566 | 52.816 |
|                     | Control > 5 years | 26.795* | 8.395  | 0.022 | 2.842   | 50.749 |
|                     | Autism > 5 years  | 23.830  | 8.351  | 0.050 | -.027   | 47.687 |
| Autism<br>> 5 years | Control < 5years  | -10.705 | 11.007 | 0.930 | -48.535 | 27.125 |
|                     | Control > 5 years | 2.965   | 4.429  | 0.986 | -9.230  | 15.161 |
|                     | Autism < 5years   | -23.830 | 8.351  | 0.050 | -47.687 | 0.027  |

\*. Mean difference is significant at  $p < 0.05$

Table S16. Tamhane test for multiple comparisons. according to age groups for proline in urine.

| (I)age<br>groups     | (j) age groups    | Mean<br>differenc<br>e (I-J) | Stand<br>ard<br>error | Sig.  | 95% Confidence<br>Inferio<br>r limit | Superior<br>limit |
|----------------------|-------------------|------------------------------|-----------------------|-------|--------------------------------------|-------------------|
| Control<br>< 5years  | Control > 5 years | 24.988                       | 19.279                | 0.801 | -44.646                              | 94.624            |
|                      | Autism < 5years   | 13.275                       | 19.506                | 0.987 | -56.063                              | 82.613            |
|                      | Autism > 5 years  | 23.765                       | 19.304                | 0.833 | -45.834                              | 93.364            |
| Control<br>> 5 years | Control < 5years  | -24.988                      | 19.279                | 0.801 | -94.624                              | 44.646            |
|                      | Autism < 5years   | -11.713*                     | 3.331                 | 0.011 | -21.286                              | -2.142            |
|                      | Autism > 5 years  | -1.223                       | 1.807                 | 0.985 | -6.208                               | 3.761             |
| Autism<br>< 5years   | Control < 5years  | -13.275                      | 19.506                | 0.987 | -82.613                              | 56.063            |
|                      | Control > 5 years | 11.713*                      | 3.331                 | 0.011 | 2.142                                | 21.286            |
|                      | Autism > 5 years  | 10.490*                      | 3.473                 | 0.032 | 0.632                                | 20.348            |
| Autism<br>> 5 years  | Control < 5years  | -23.765                      | 19.304                | 0.833 | -93.364                              | 45.834            |
|                      | Control > 5 years | 1.223                        | 1.807                 | 0.985 | -3.761                               | 6.208             |
|                      | Autism < 5years   | -10.490*                     | 3.473                 | 0.032 | -20.348                              | -0.632            |

\*. Mean difference is significant at  $p < 0.05$



Table S19. Mann–Whitney test for sarcosine in urine

| Test Statistics <sup>a</sup>     |         |
|----------------------------------|---------|
| Mann-Whitney U                   | 142.500 |
| Wilcoxon W                       | 395.500 |
| Z                                | -2.721  |
| Asymp. Sig. (2-tailed)           | 0.007   |
| a. Grouped variables: age groups |         |

Table S20. Mann – Whitney Test for urinary alanine

| Statistica Testului <sup>a</sup>      |         |
|---------------------------------------|---------|
| Mann-Whitney U                        | 126.000 |
| Wilcoxon W                            | 379.000 |
| Z                                     | -2.368  |
| Asymp. Sig. (2-tailed)                | 0.018   |
| a. Variabile grupate: grupe de vârstă |         |
